# Supplementary material for: Highly stable Ni(ii)/Zn(ii)-CPs as multiresponsive luminescent sensors for detection of IO4−, 2,6-dichloro-4-nitrophenol and folic acid
Source: Royal Society of Chemistry journal article supplement (doi:10.1039/d4tc01686f), 2024-01-01
Supplement: d4tc01686f1.pdf [file d4tc01686f1.pdf]

## Electronic Supplementary Information

### **Highly stable Ni(II)/Zn(II)-CPs as multiresponsive luminescent sensors for detection of $\text{IO}_4^-$ , 2,6-dichloro-4-nitrophenol and folic acid**

Fang-Hua Zhao\*, Zi-Hao Zhao, Rui Feng, Yu-Shuo Li, Shu-Qi Li, Zhi-Hong Jing, Zhong-Lin Li\*

Key Laboratory of Life-Organic Analysis of Shandong Province, School of Chemistry and Chemical Engineering, Qufu Normal University, Qufu 273165, China.

\*Corresponding author. Email: zfh101@163.com (F.-H. Zhao); lizhonglin788@163.com (Z.-L. Li)

|                                                                                                                                         |    |
|-----------------------------------------------------------------------------------------------------------------------------------------|----|
| Table S1. Crystal data and structure refinements .....                                                                                  | 3  |
| Table S2. Bond Lengths (Å) and Bond Angles (°).....                                                                                     | 4  |
| Table S3. Hydrogen Bond Lengths (Å) and Bond Angles (°).....                                                                            | 5  |
| Table S4. Comparison of materials for IO <sub>4</sub> <sup>-</sup> detection. ....                                                      | 6  |
| Table S5. Comparison of materials for FA detection.....                                                                                 | 6  |
| Scheme S1. The coordination modes of seb <sup>2-</sup> and bbimh.....                                                                   | 6  |
| Fig. S1. The simulated and experimental PXRD patterns.....                                                                              | 7  |
| Fig. S2. The TGA curves.....                                                                                                            | 7  |
| Fig. S3. The N <sub>2</sub> adsorption/desorption isotherms.....                                                                        | 7  |
| Fig. S4. The IR spectra.....                                                                                                            | 8  |
| Fig. S5. The solid UV-visible and diffuse reflectance spectra .....                                                                     | 8  |
| Fig. S6. The fluorescence emission intensities in water, EtOH (c) and different pH .....                                                | 9  |
| Fig. S7. PXRD patterns in different pH, water and EtOH. ....                                                                            | 10 |
| Fig. S8. Emission intensities in different anions and photographs, fluorescence responses coexisting with other anions. ....            | 10 |
| Fig. S9. Emission response in swimming pool water, S-V plots and anti-interference experiment .....                                     | 12 |
| Fig. S10. Emission spectra in different agricultural chemicals and fluorescence responses with other agricultural chemicals.....        | 13 |
| Fig. S11. Emission response in farmland sewage, S-V plots and anti-interference experiment.....                                         | 14 |
| Fig. S12. Emission spectra in different biological analytes and photographs, fluorescence responses with other biological analytes..... | 15 |
| Fig. S13. Emission response in serum, S-V plots and anti-interference experiment .....                                                  | 16 |
| Fig. S14. PXRD patterns after the detection. ....                                                                                       | 17 |
| Fig. S15. IR spectra of after the detection. ....                                                                                       | 17 |
| Fig. S16. The overlap of the UV-vis spectra of analytes with the fluorescence spectra of 1 and 2.....                                   | 17 |
| Fig. S17. Fluorescence lifetimes before and after addition of the test substance.....                                                   | 18 |
| Fig. S18. The fluorescence intensity after five cycles of the experiment.....                                                           | 19 |
| Fig. S19. PXRD patterns after five cycles of the experiment. ....                                                                       | 19 |
| Fig. S20. The films of toward IO <sub>4</sub> <sup>-</sup> , 2,6-DCNP and FA under 365 nm UV lamp. ....                                 | 19 |

**Table S1.** Crystal data and structure refinements for **1** and **2**

| Identification code                                           | <b>1</b>                                                                          | <b>2</b>                                                          |
|---------------------------------------------------------------|-----------------------------------------------------------------------------------|-------------------------------------------------------------------|
| Empirical formula                                             | C <sub>110</sub> H <sub>150</sub> N <sub>16</sub> O <sub>19</sub> Ni <sub>3</sub> | C <sub>30</sub> H <sub>40</sub> N <sub>4</sub> O <sub>5</sub> Zn  |
| Formula weight                                                | 2176.58                                                                           | 602.03                                                            |
| Temperature/K                                                 | 153(2)                                                                            | 153(2)                                                            |
| Crystal system                                                | Triclinic                                                                         | Triclinic                                                         |
| Space group                                                   | <i>P</i> -1                                                                       | <i>P</i> -1                                                       |
| <i>a</i> (Å)                                                  | 9.6380(6)                                                                         | 8.6275(6)                                                         |
| <i>b</i> (Å)                                                  | 16.3649(10)                                                                       | 11.5489(9)                                                        |
| <i>c</i> (Å)                                                  | 17.7092(11)                                                                       | 16.2320(13)                                                       |
| $\alpha$ (°)                                                  | 77.012(3)                                                                         | 108.870(2)                                                        |
| $\beta$ (°)                                                   | 87.238(3)                                                                         | 93.870(3)                                                         |
| $\gamma$ (°)                                                  | 79.995(3)                                                                         | 109.641(4)                                                        |
| <i>V</i> (Å <sup>3</sup> )                                    | 2680.2(3)                                                                         | 1421.03(19)                                                       |
| <i>Z</i>                                                      | 1                                                                                 | 2                                                                 |
| $\rho_{\text{calc}}$ (g/cm <sup>3</sup> )                     | 1.349                                                                             | 1.407                                                             |
| $\mu$ /mm <sup>-1</sup>                                       | 0.597                                                                             | 0.911                                                             |
| <i>R</i> <sub>int</sub>                                       | 0.0510                                                                            | 0.0720                                                            |
| Reflections collected                                         | 46525                                                                             | 24787                                                             |
| Data/restraints/parameters                                    | 10514/1/676                                                                       | 5587/0/364                                                        |
| Goodness-of-fit on F <sup>2</sup>                             | 1.015                                                                             | 1.009                                                             |
| Final <i>R</i> indexes [ <i>I</i> > 2 $\sigma$ ( <i>I</i> ) ] | <i>R</i> <sub>1</sub> = 0.0493<br><i>wR</i> <sub>2</sub> = 0.1205                 | <i>R</i> <sub>1</sub> = 0.0418<br><i>wR</i> <sub>2</sub> = 0.0798 |
| Final <i>R</i> indexes [all data]                             | <i>R</i> <sub>1</sub> = 0.0792<br><i>wR</i> <sub>2</sub> = 0.1393                 | <i>R</i> <sub>1</sub> = 0.0700<br><i>wR</i> <sub>2</sub> = 0.0900 |
| Largest diff. peak/hole/e Å <sup>-3</sup>                     | 1.03/-0.5                                                                         | 0.37/-0.34                                                        |
| CCDC                                                          | 2348596                                                                           | 2348597                                                           |

**Table S2.** Bond Lengths (Å) and Bond Angles (°) for **1** and **2**.

|           |                     |           |                                      |            |                                      |           |            |
|-----------|---------------------|-----------|--------------------------------------|------------|--------------------------------------|-----------|------------|
| <b>1</b>  | N1–Ni1              | 2.138(2)  | N7–Ni1                               | 2.152(2)   | Ni1–O2                               | 2.157(2)  |            |
|           | N3–Ni2              | 2.065(2)  | Ni1–O5                               | 2.017(2)   | Ni2–O4                               | 2.100(2)  |            |
|           | N5–Ni1              | 2.087(3)  | Ni1–O1                               | 2.1107(19) | Ni2–O4 <sup>5</sup>                  | 2.100(2)  |            |
|           | Ni2–O3 <sup>5</sup> | 2.142(2)  | Ni2–O3                               | 2.142(2)   | O5–Ni1–N5                            | 87.90(10) |            |
|           | O5–Ni1–O1           | 169.79(9) | N3–Ni2–N3 <sup>6</sup>               | 180        | O4 <sup>6</sup> –Ni2–O3 <sup>6</sup> | 61.93(8)  |            |
|           | N5–Ni1–O1           | 102.28(9) | N3 <sup>6</sup> –Ni2–O4              | 89.04(8)   | O4–Ni2–O3 <sup>6</sup>               | 118.07(8) |            |
|           | O5–Ni1–N1           | 92.14(9)  | N3–Ni2–O4                            | 90.96(8)   | O3–Ni2–O3                            | 180       |            |
|           | N5–Ni1–N1           | 87.63(9)  | N3 <sup>6</sup> –Ni2–O4 <sup>6</sup> | 90.96(8)   | N1–Ni1–O2                            | 89.71(8)  |            |
|           | O1–Ni1–N1           | 89.11(8)  | N3–Ni2–O4 <sup>6</sup>               | 89.04(8)   | N7–Ni1–O2                            | 87.35(8)  |            |
|           | O5–Ni1–N7           | 88.62(9)  | O4 <sup>6</sup> –Ni2–O4              | 180        | N5–Ni1–O2                            | 164.00(9) |            |
|           | N5–Ni1–N7           | 95.24(9)  | N3 <sup>6</sup> –Ni2–O3 <sup>6</sup> | 90.18(9)   | O1–Ni1–O2                            | 61.89(8)  |            |
|           | O1–Ni1–N7           | 89.64(8)  | N3 <sup>6</sup> –Ni2–O3              | 89.83(9)   | N3–Ni2–O3 <sup>6</sup>               | 89.83(9)  |            |
|           | N1–Ni1–N7           | 177.06(9) | O4 <sup>6</sup> –Ni2–O3              | 118.07(8)  | N3–Ni2–O3                            | 90.17(9)  |            |
|           | O5–Ni1–O2           | 107.98(9) | O4–Ni2–O3                            | 61.93(8)   |                                      |           |            |
|           | <b>2</b>            | N1–Zn1    | 2.007(2)                             | N5–Zn1     | 2.006(2)                             | O1–Zn1    | 1.9551(19) |
|           |                     | O3–Zn1    | 1.973(2)                             | O3–Zn1–N5  | 101.72(9)                            | O3–Zn1–N1 | 102.00(9)  |
| O1–Zn1–O3 |                     | 115.61(8) | O1–Zn1–N1                            | 102.64(9)  | N5–Zn1–N1                            | 118.68(9) |            |
| O1–Zn1–N5 |                     | 115.92(9) |                                      |            |                                      |           |            |

**1:** <sup>1</sup>-1+X,-1+Y,1+Z; <sup>2</sup>2-X,1-Y,1-Z; <sup>3</sup>1-X,1-Y,1-Z; <sup>4</sup>2-X,2-Y,-Z; <sup>5</sup>3-X,2-Y,-1-Z. <sup>1</sup>-1+X,-1+Y,1+Z; <sup>2</sup>1+X,1+Y,-1+Z; <sup>3</sup>2-X,1-Y,1-Z; <sup>4</sup>1-X,1-Y,1-Z; <sup>5</sup>2-X,2-Y,-Z; <sup>6</sup>3-X,2-Y,-1-Z.

**2:** <sup>1</sup>2-X,1-Y,2-Z; <sup>2</sup>1-X,-1-Y,1-Z; <sup>3</sup>3-X,1-Y,2-Z; <sup>4</sup>2-X,-1-Y,1-Z. <sup>1</sup>2-X,1-Y,2-Z; <sup>2</sup>1-X,-1-Y,1-Z; <sup>3</sup>3-X,1-Y,2-Z; <sup>4</sup>2-X,-1-Y,1-Z.

**Table S3.** Hydrogen Bond Lengths (Å) and Bond Angles (°) for **1** and **2**

|               | D–H···A                    | d(D–H) | d(H···A) | d(D···A) | ∠(D–H···A) |
|---------------|----------------------------|--------|----------|----------|------------|
| <b>1</b>      | O9–H9D···O6 <sup>3</sup>   | 0.86   | 1.94     | 2.789(4) | 166        |
|               | O9–H9C···O4 <sup>6</sup>   | 0.86   | 1.94     | 2.754(3) | 159        |
|               | O8–H8D···O3 <sup>5</sup>   | 0.85   | 1.99     | 2.823(3) | 162.8      |
|               | O8–H8C···O9 <sup>3</sup>   | 0.85   | 1.96     | 2.815(3) | 173        |
|               | O7–H7D···O8                | 0.86   | 2.09     | 2.890(4) | 155.6      |
|               | O7–H7C···O6                | 0.87   | 1.97     | 2.833(4) | 173.3      |
|               | C54–H54···O8 <sup>4</sup>  | 0.95   | 2.43     | 3.222(4) | 140.4      |
|               | C51–H51···O10              | 0.95   | 2.6      | 3.473(7) | 153        |
|               | C49–H49···O7               | 0.95   | 2.36     | 3.180(4) | 144.4      |
|               | C49–H49···O5               | 0.95   | 2.23     | 2.801(4) | 117.5      |
|               | C48–H48A···O7              | 0.99   | 2.62     | 3.470(5) | 143.4      |
|               | C43–H43B···O9 <sup>3</sup> | 0.99   | 2.64     | 3.564(4) | 155.5      |
|               | C38–H38···O1               | 0.95   | 2.41     | 3.114(4) | 130.4      |
|               | C36–H36···O5               | 0.95   | 2.48     | 2.981(4) | 112.7      |
|               | C34–H34···O9               | 0.95   | 2.51     | 3.412(4) | 158.1      |
|               | C29–H29···O6               | 0.95   | 2.47     | 3.194(4) | 132.7      |
|               | C28–H28B···O6 <sup>2</sup> | 0.99   | 2.61     | 3.464(4) | 144.1      |
|               | C18–H18···O5               | 0.95   | 2.59     | 3.288(4) | 130.5      |
|               | C16–H16···O10 <sup>1</sup> | 0.95   | 2.36     | 3.061(6) | 130        |
|               | C16–H16···O1               | 0.95   | 2.48     | 2.966(3) | 111.5      |
| C12–H12B···O2 | 0.99                       | 2.46   | 3.412(4) | 160.2    |            |
| <b>2</b>      | C11–H11···O5 <sup>1</sup>  | 0.95   | 2.21     | 3.054(3) | 147.8      |
|               | C18–H18B···O3 <sup>2</sup> | 0.99   | 2.63     | 3.597(4) | 165.3      |
|               | C23–H23A···O4 <sup>1</sup> | 0.99   | 2.49     | 3.425(4) | 157.3      |
|               | C29–H29···O2 <sup>3</sup>  | 0.95   | 2.24     | 3.176(4) | 166.2      |

**1:** <sup>1</sup>2-X,1-Y,-Z; <sup>2</sup>2-X,2-Y,-Z; <sup>3</sup>1-X,1-Y,1-Z; <sup>4</sup>1-X,2-Y,-Z; <sup>5</sup>-1+X,+Y,1+Z; <sup>6</sup>-1+X,-1+Y,1+Z.

**2:** <sup>1</sup>1+X,+Y,+Z; <sup>2</sup>2-X,-Y,2-Z; <sup>3</sup>2-X,-Y,1-Z.

**Table S4.** Comparison of materials for IO<sub>4</sub><sup>-</sup> detection.

| Material                                                                                               | Methods  | Medium | $K_{sv}/M^{-1}$    | LOD/M                 | Ref.      |
|--------------------------------------------------------------------------------------------------------|----------|--------|--------------------|-----------------------|-----------|
| Zn-DBD-SA                                                                                              | Turn-off | Water  | $2.46 \times 10^4$ | $6.36 \times 10^{-8}$ | 57        |
| [Zn <sub>2</sub> L2(H <sub>2</sub> O) <sub>4</sub> ]·H <sub>2</sub> O                                  | Turn-on  | Water  | $2.34 \times 10^5$ | $3.8 \times 10^{-8}$  | 58        |
| {Ni <sub>3</sub> (seb) <sub>3</sub> (bbimh) <sub>4</sub> ·7H <sub>2</sub> O} <sub>n</sub> ( <b>1</b> ) | Turn-off | Water  | $8.52 \times 10^4$ | $1.23 \times 10^{-6}$ | This work |
| {Zn(seb)(bbimh)·H <sub>2</sub> O} <sub>n</sub> ( <b>2</b> )                                            | Turn-off | Water  | $8.31 \times 10^4$ | $1.26 \times 10^{-6}$ | This work |

**Table S5.** Comparison of materials for FA detection

| Material                                                                                                                                            | Methods  | Medium | $K_{sv} / M^{-1}$  | LOD / M               | Ref.      |
|-----------------------------------------------------------------------------------------------------------------------------------------------------|----------|--------|--------------------|-----------------------|-----------|
| [EuZn(LZ) <sub>2</sub> (HCOO)(H <sub>2</sub> O) <sub>3</sub> ] <sub>n</sub>                                                                         | Turn-on  | Water  | $3.94 \times 10^5$ | $1.84 \times 10^{-8}$ | 59        |
| Eu(HDPB)(phen)                                                                                                                                      | Turn-off | Water  | $3.44 \times 10^4$ | $1.55 \times 10^{-6}$ | 60        |
| [Eu <sub>0.06</sub> Tb <sub>0.04</sub> Gd <sub>0.9</sub> (HDPNC) <sub>1.5</sub> (H <sub>2</sub> O)(DMF) <sub>2</sub> ·H <sub>2</sub> O              | Turn-on  | Water  | $4.35 \times 10^5$ | $8.83 \times 10^{-8}$ | 61        |
| {[(CH <sub>2</sub> ) <sub>2</sub> NH <sub>2</sub> ] <sub>3</sub> [RE <sub>2</sub> (BTDBA) <sub>2</sub> (HCOO)]·5H <sub>2</sub> O·2DMF} <sub>n</sub> | Turn-off | Water  | —                  | $2 \times 10^{-5}$    | 62        |
| [Eu(ppda)(bpdc) <sub>0.5</sub> (C <sub>2</sub> H <sub>5</sub> OH)(H <sub>2</sub> O)] <sub>n</sub>                                                   | Turn-off | Water  | —                  | $3.28 \times 10^{-8}$ | 63        |
| {[Ni <sub>3</sub> (seb) <sub>3</sub> (bbimh) <sub>4</sub> ·7H <sub>2</sub> O] <sub>n</sub> ( <b>1</b> )                                             | Turn-off | Water  | $1.38 \times 10^4$ | $1.30 \times 10^{-5}$ | This work |
| {[Zn(seb)(bbimh)]·H <sub>2</sub> O] <sub>n</sub> ( <b>2</b> )                                                                                       | Turn-off | Water  | $6.69 \times 10^3$ | $1.57 \times 10^{-5}$ | This work |

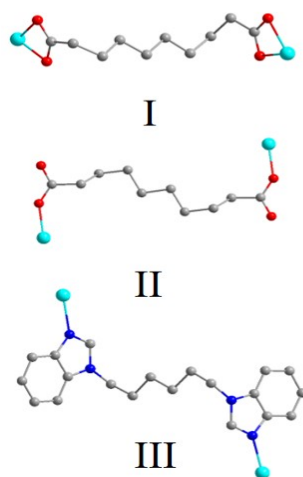**Scheme S1.** The coordination modes of seb<sup>2-</sup> and bbimh in **1** and **2**.

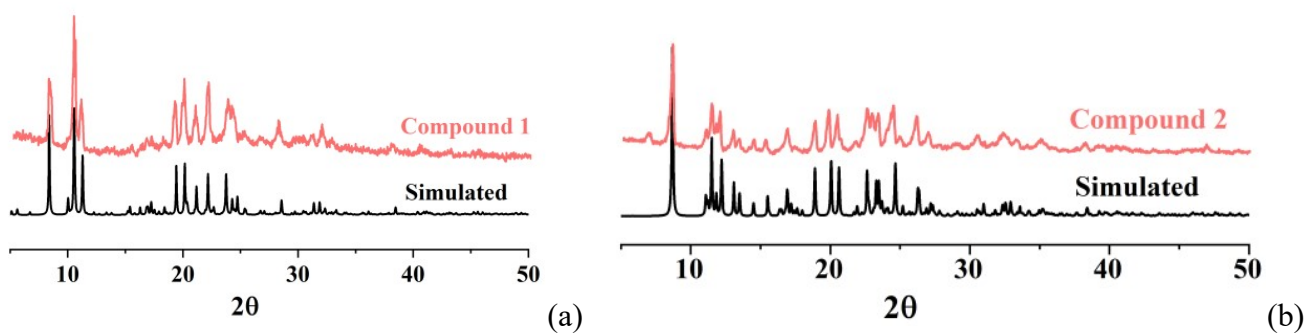

**Fig. S1.** (a) and (b) The simulated and experimental PXRD patterns of 1 and 2.

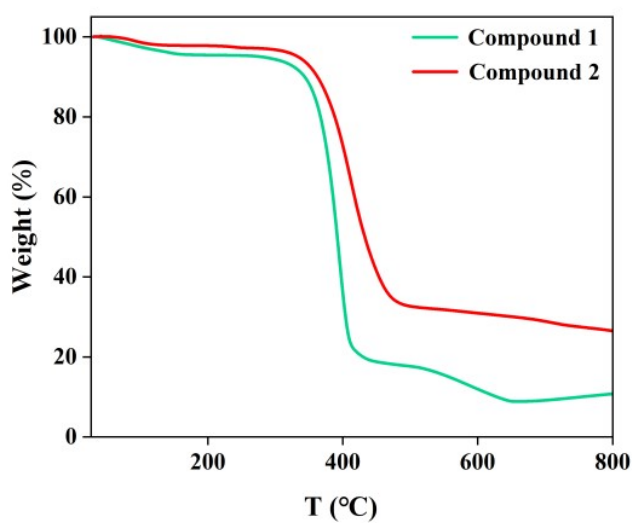

**Fig. S2.** The TGA curves of 1 and 2.

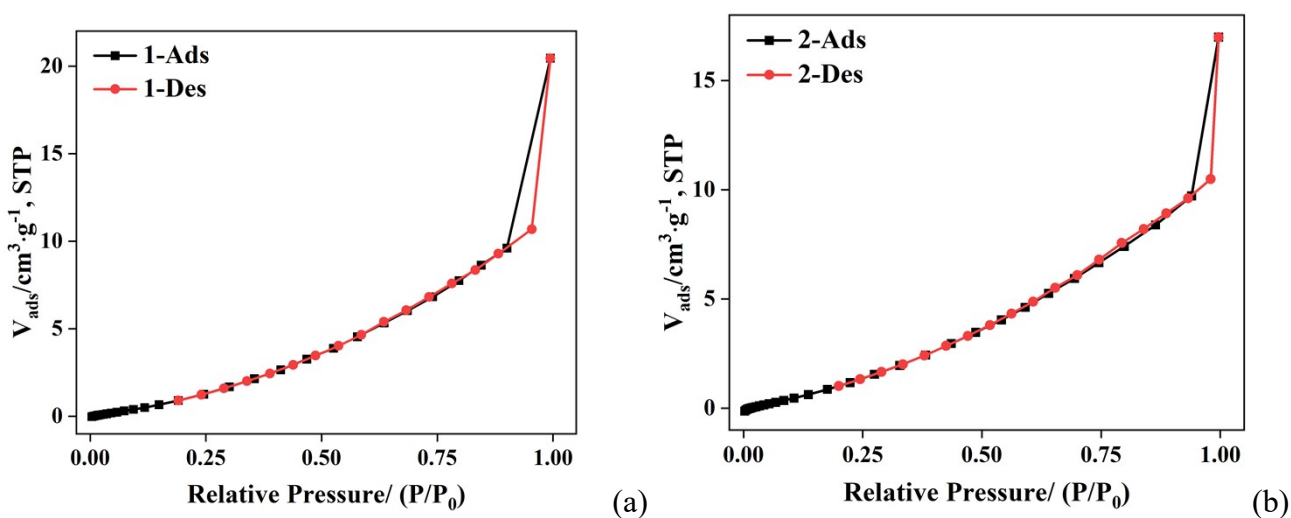

**Fig. S3.** The N<sub>2</sub> adsorption/desorption isotherms of 1 (a) and 2 (b).

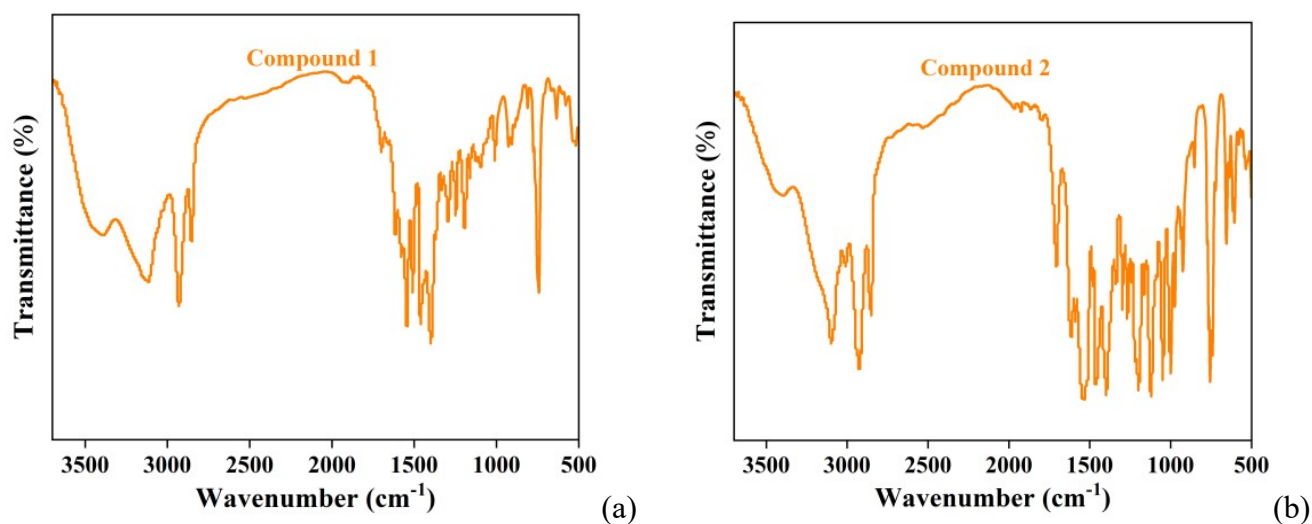

Fig. S4. The IR spectra of 1 and 2.

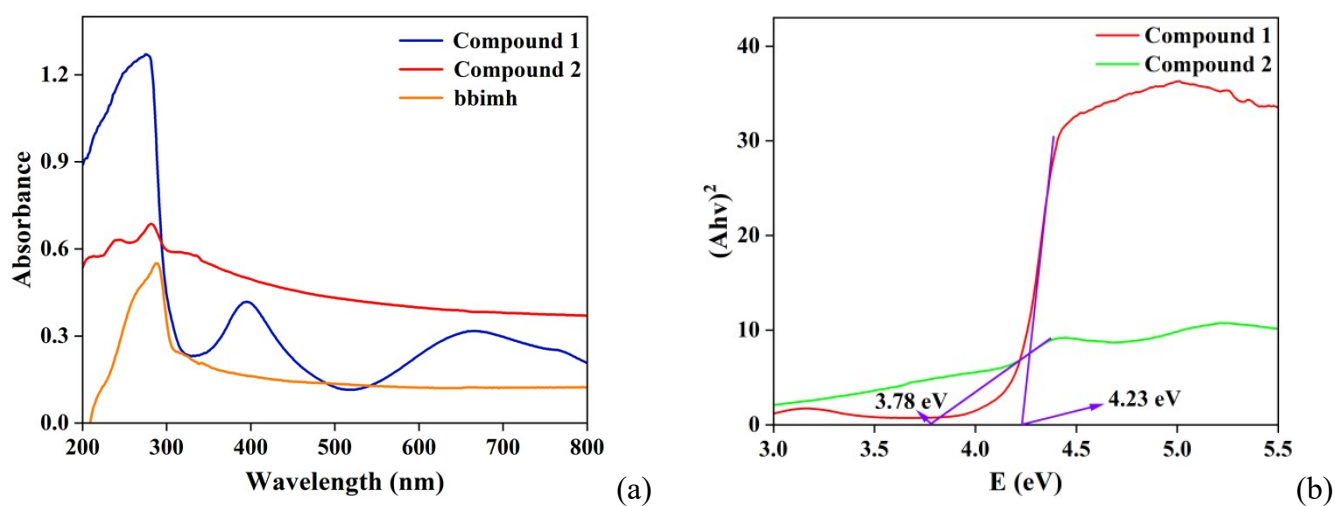

Fig. S5. (a) The solid UV-visible absorption spectra of 1, 2 and bbimh. (b) Diffuse reflectance spectra of 1 and 2.

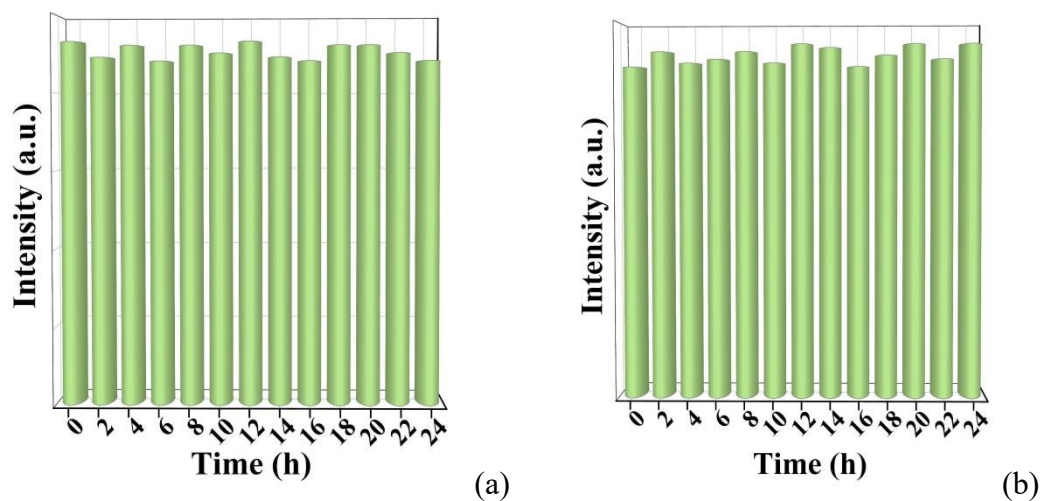



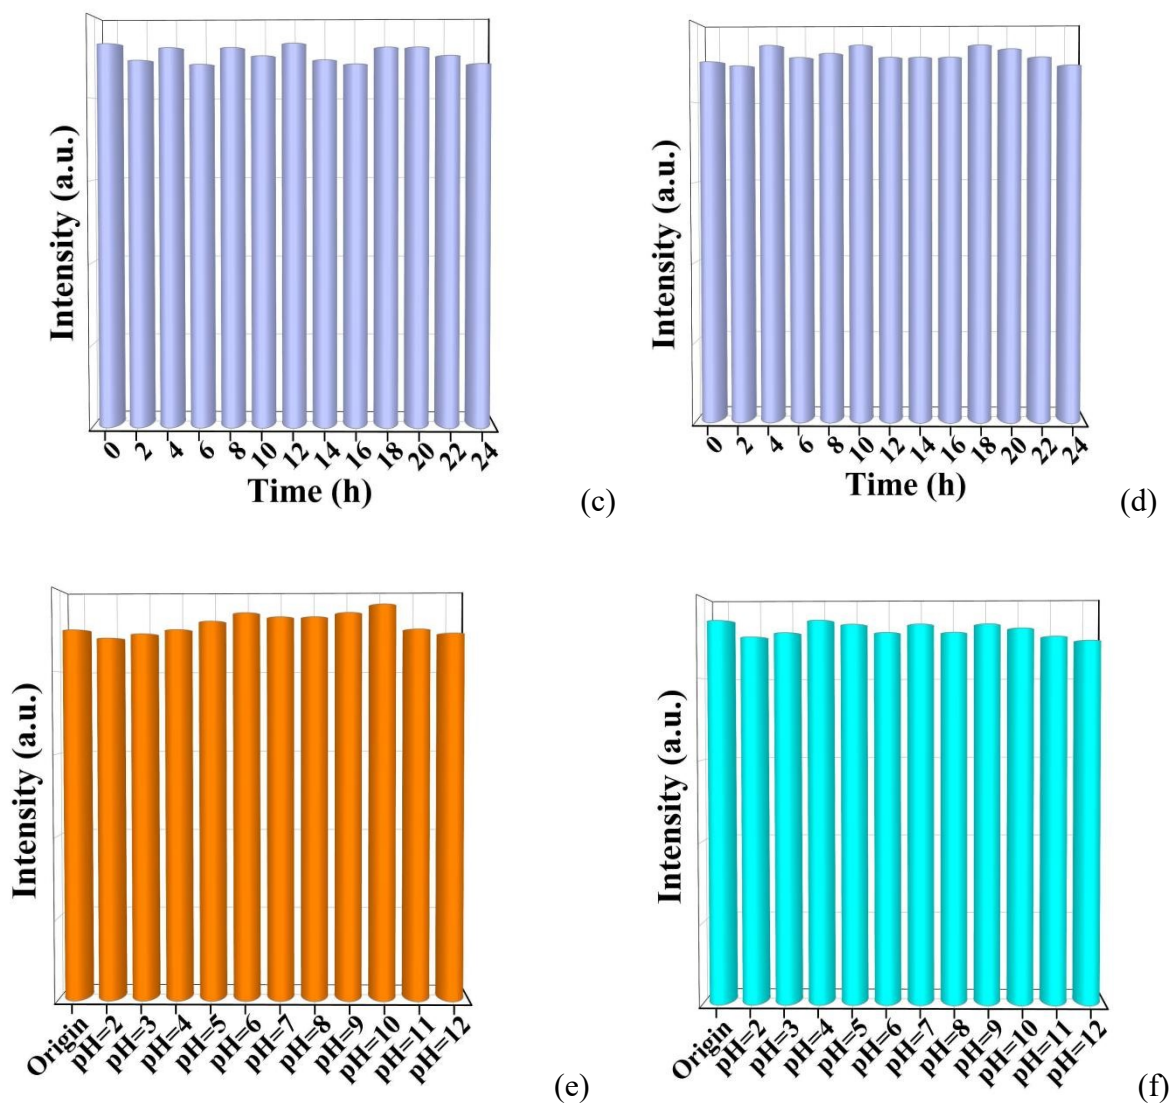

**Fig. S6.** The fluorescence emission intensities of **1** and **2** in water (a) and (b), EtOH (c) and (d), and different pH (e) and (f).

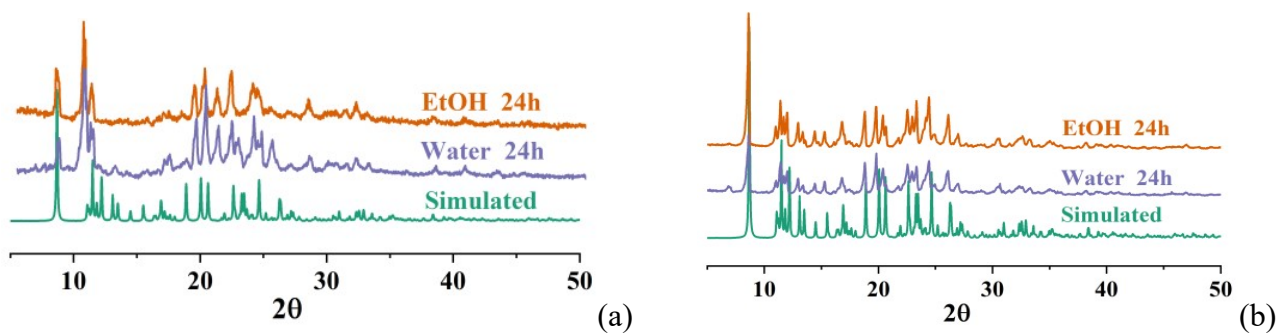

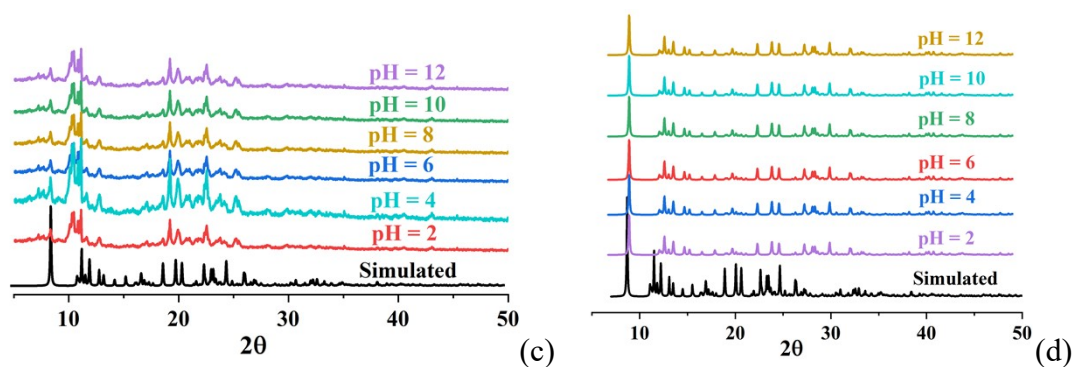

**Fig. S7.** (a) and (b) PXRD patterns of **1** and **2** after 24h in water and EtOH. (c) and (d) PXRD patterns of **1** and **2** in different pH values.

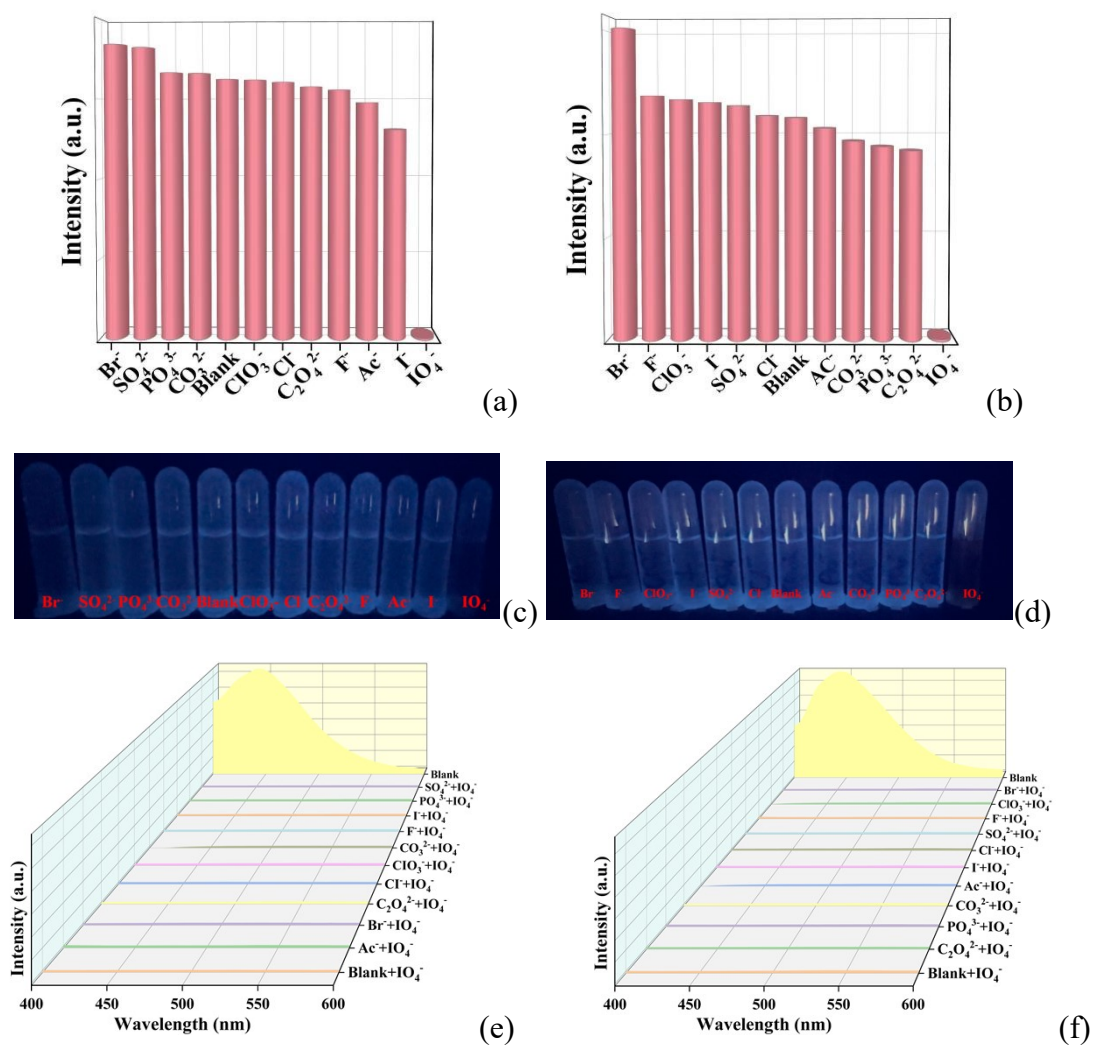

**Fig. S8.** (a) and (b) Emission intensities of **1** and **2** in different anions aqueous solutions, as well as the corresponding photographs under 365 nm UV light (c) and (d). (e) and (f) Fluorescence responses of  $\text{IO}_4^-$  for **1** and **2** coexisting with other anions.

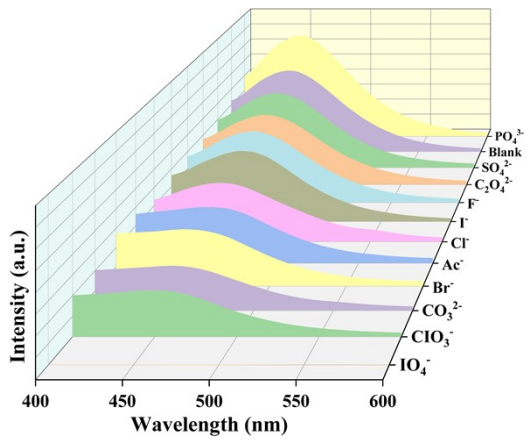

(a)

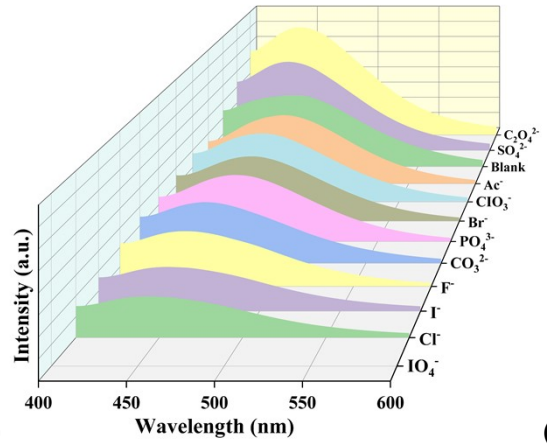

(b)

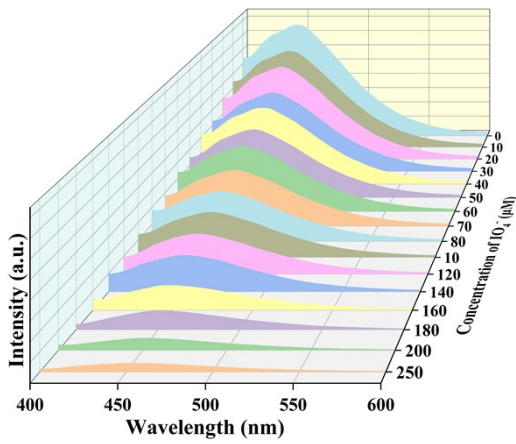

(c)

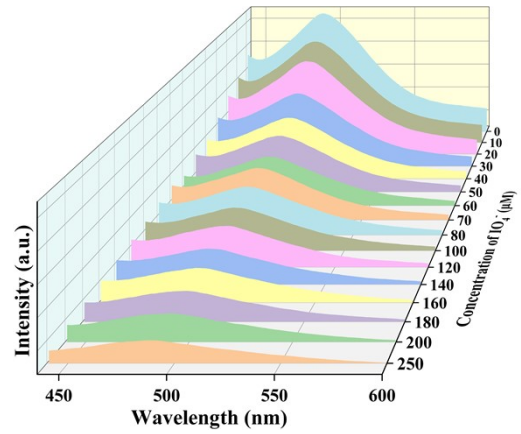

(d)

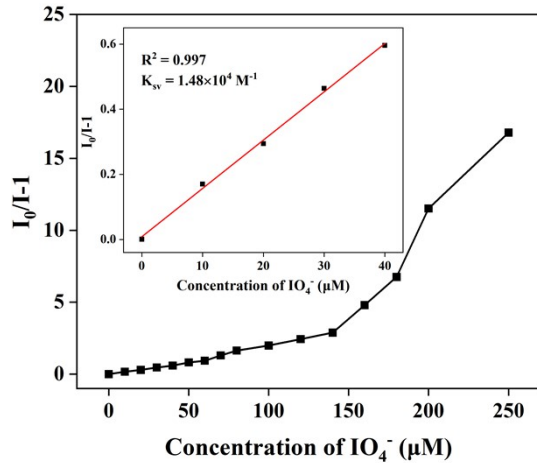

(e)

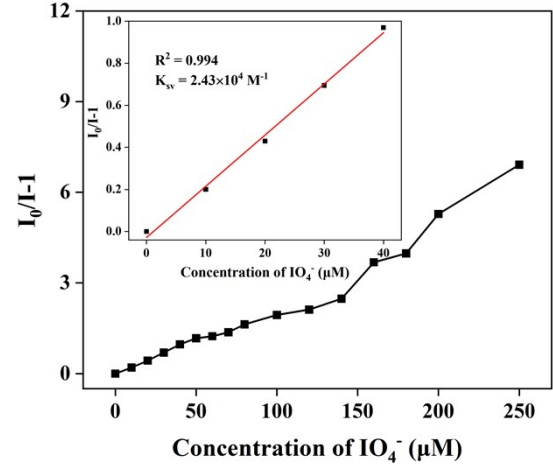

(f)

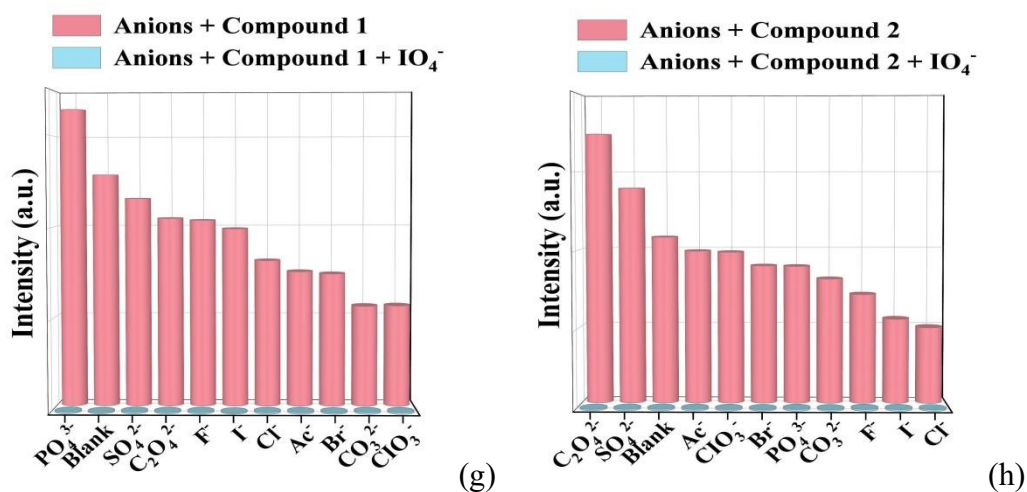

**Fig. S9.** (a) and (b) Emission response of **1** and **2** toward anions in swimming pool water. (c) and (d) Emission spectra of **1** and **2** at different concentrations of  $\text{IO}_4^-$  in swimming pool water suspensions. (e) and (f) The S-V plots of **1** and **2** toward  $\text{IO}_4^-$  in swimming pool water. (g) and (h) Anti-interference responses for **1** and **2** toward  $\text{IO}_4^-$  in the presence of other anions.

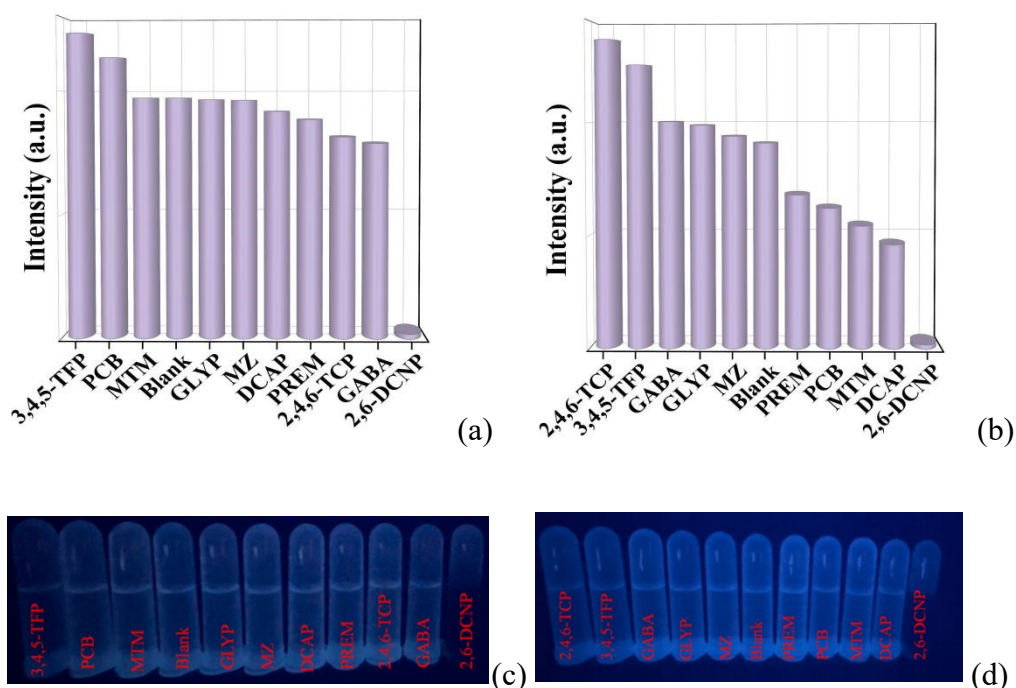



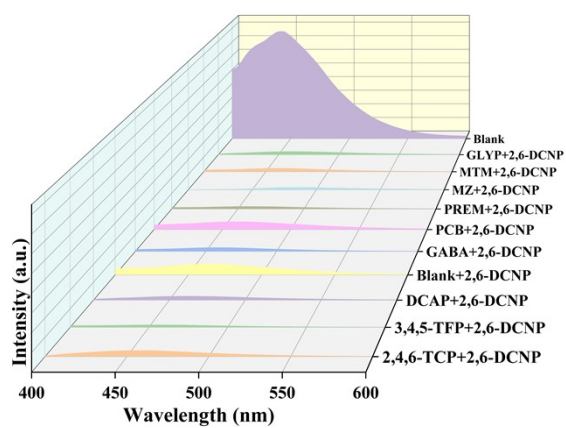

(e)

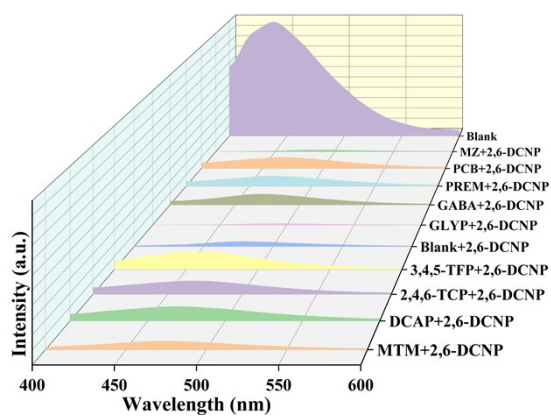

(f)

**Fig. S10.** (a) and (b) Emission intensities of **1** and **2** in EtOH solutions of different agricultural chemicals, as well as the corresponding photographs under 365 nm UV light (c) and (d). (e) and (f) Fluorescence responses of 2,6-DCNP for **1** and **2** coexisting with other agricultural chemicals in EtOH.

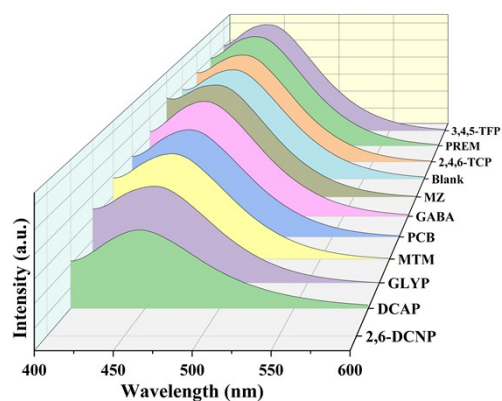

(a)

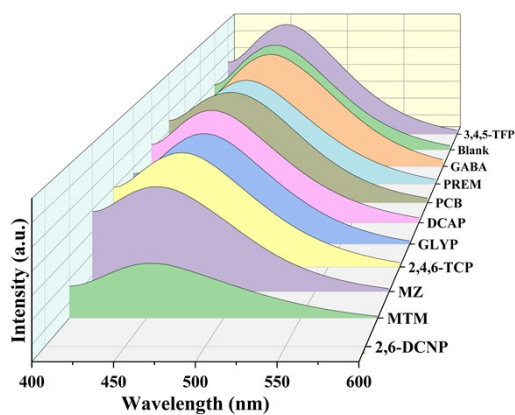

(b)

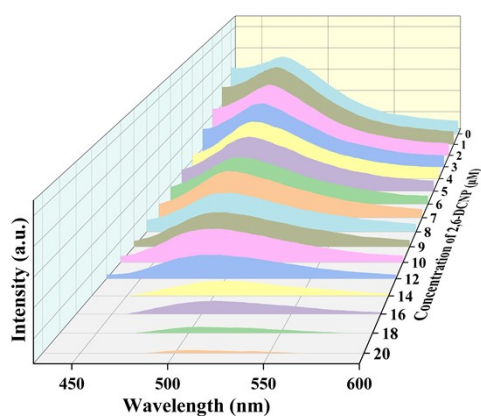

(c)

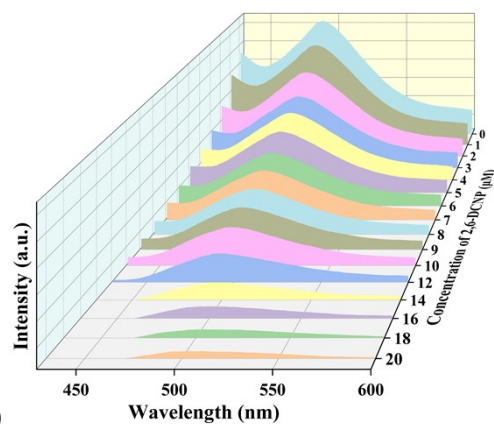

(d)

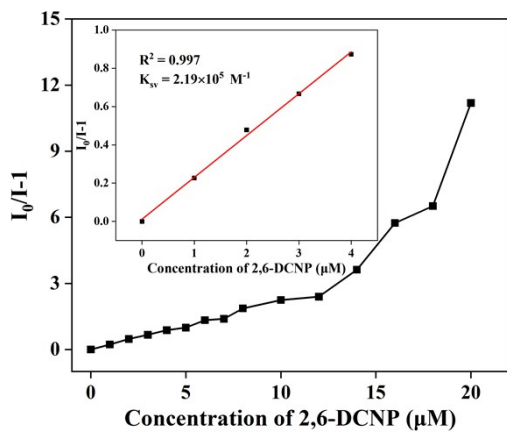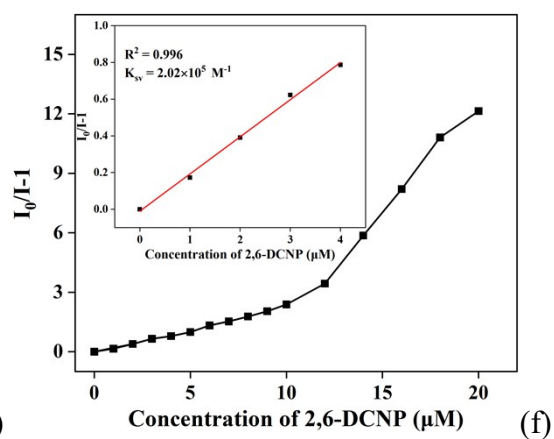

■ Agricultural chemicals + Compound 1  
■ Agricultural chemicals + Compound 1 + 2,6-DCNP

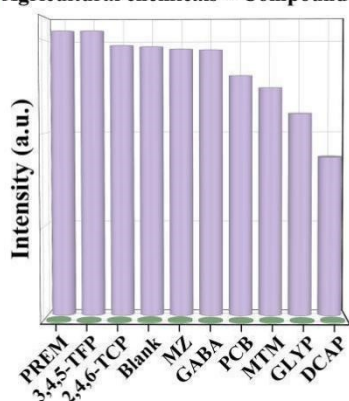

(g)

■ Agricultural chemicals + Compound 2  
■ Agricultural chemicals + Compound 2 + 2,6-DCNP

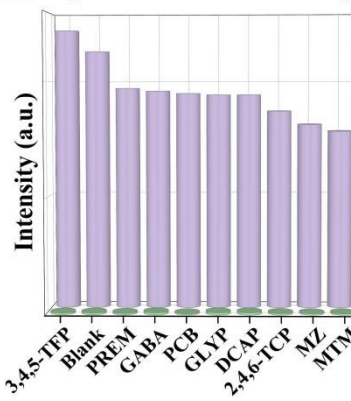

(h)

**Fig. S11.** (a) and (b) Emission response of **1** and **2** toward 2,6-DCNP in farmland sewage. (c) and (d) Emission spectra of **1** and **2** at different concentrations of 2,6-DCNP in farmland sewage. (e) and (f) The S-V plots of **1** and **2** toward 2,6-DCNP in farmland sewage. (g) and (h) Anti-interference responses for **1** and **2** toward 2,6-DCNP in the presence of other anions.

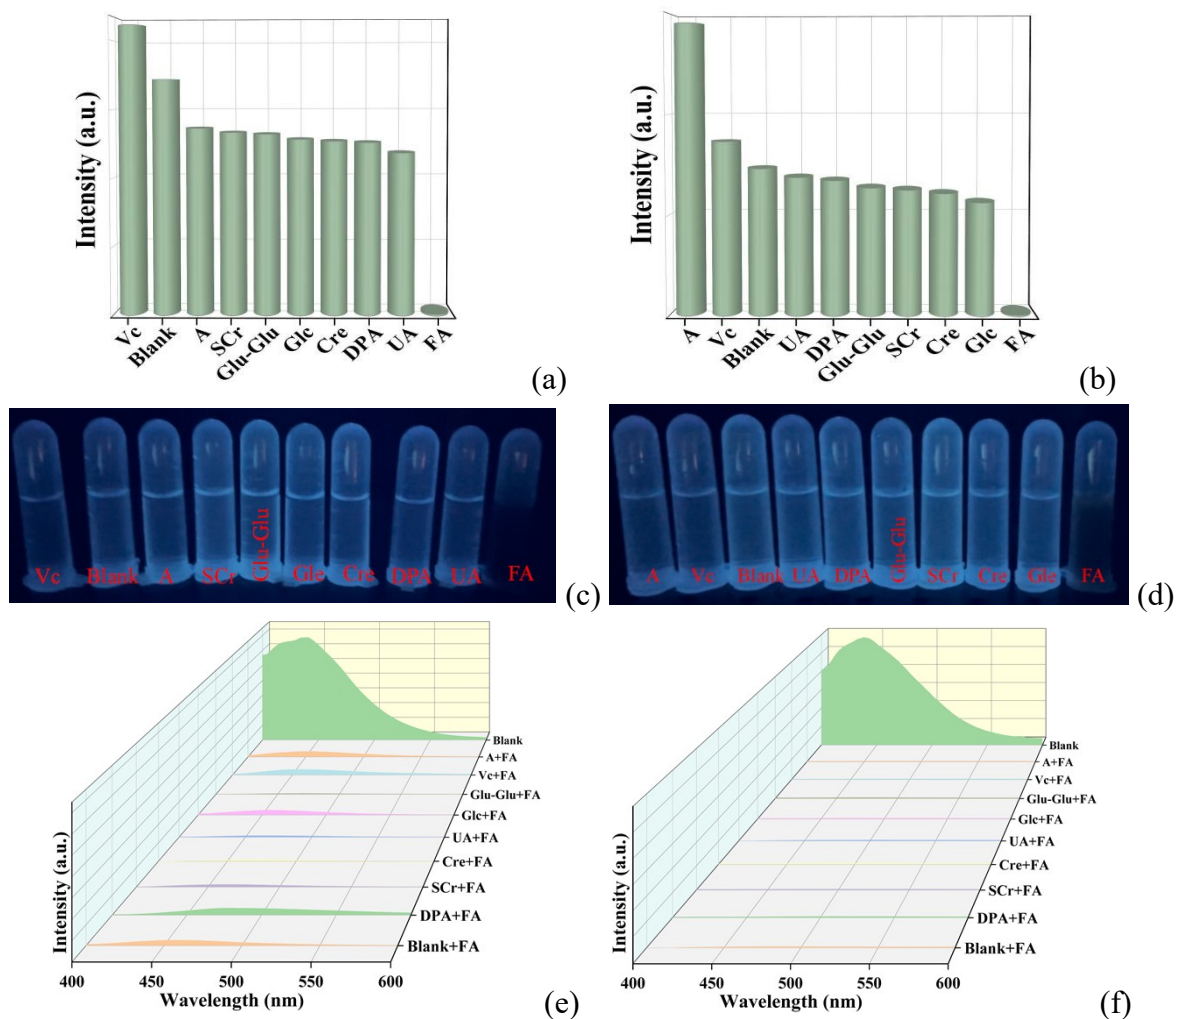

**Fig. S12.** (a) and (b) Emission intensities of **1** and **2** in aqueous solutions of different biological analytes, as well as the corresponding photographs under 365 nm UV light (c) and (d). (e) and (f) Fluorescence responses of FA for **1** and **2** coexisting with other biological analytes in water suspensions.

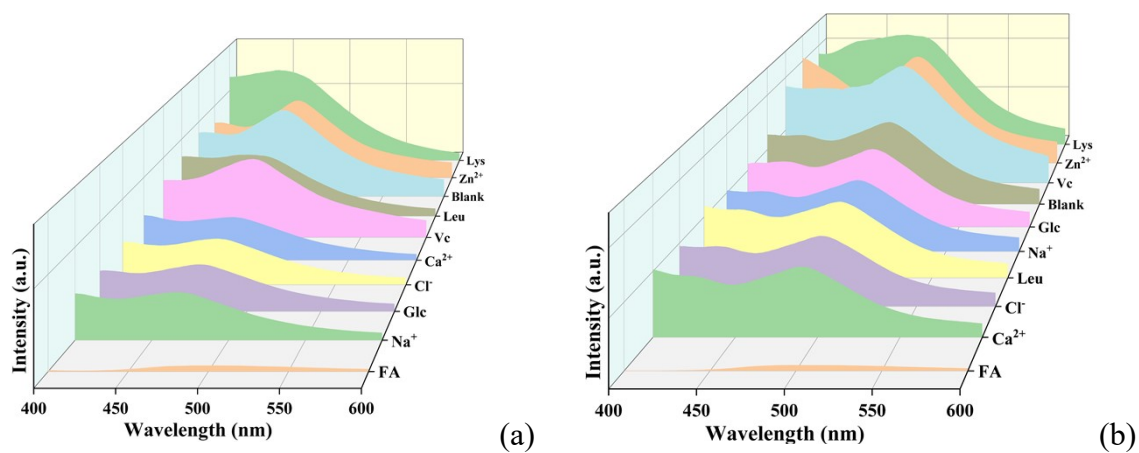

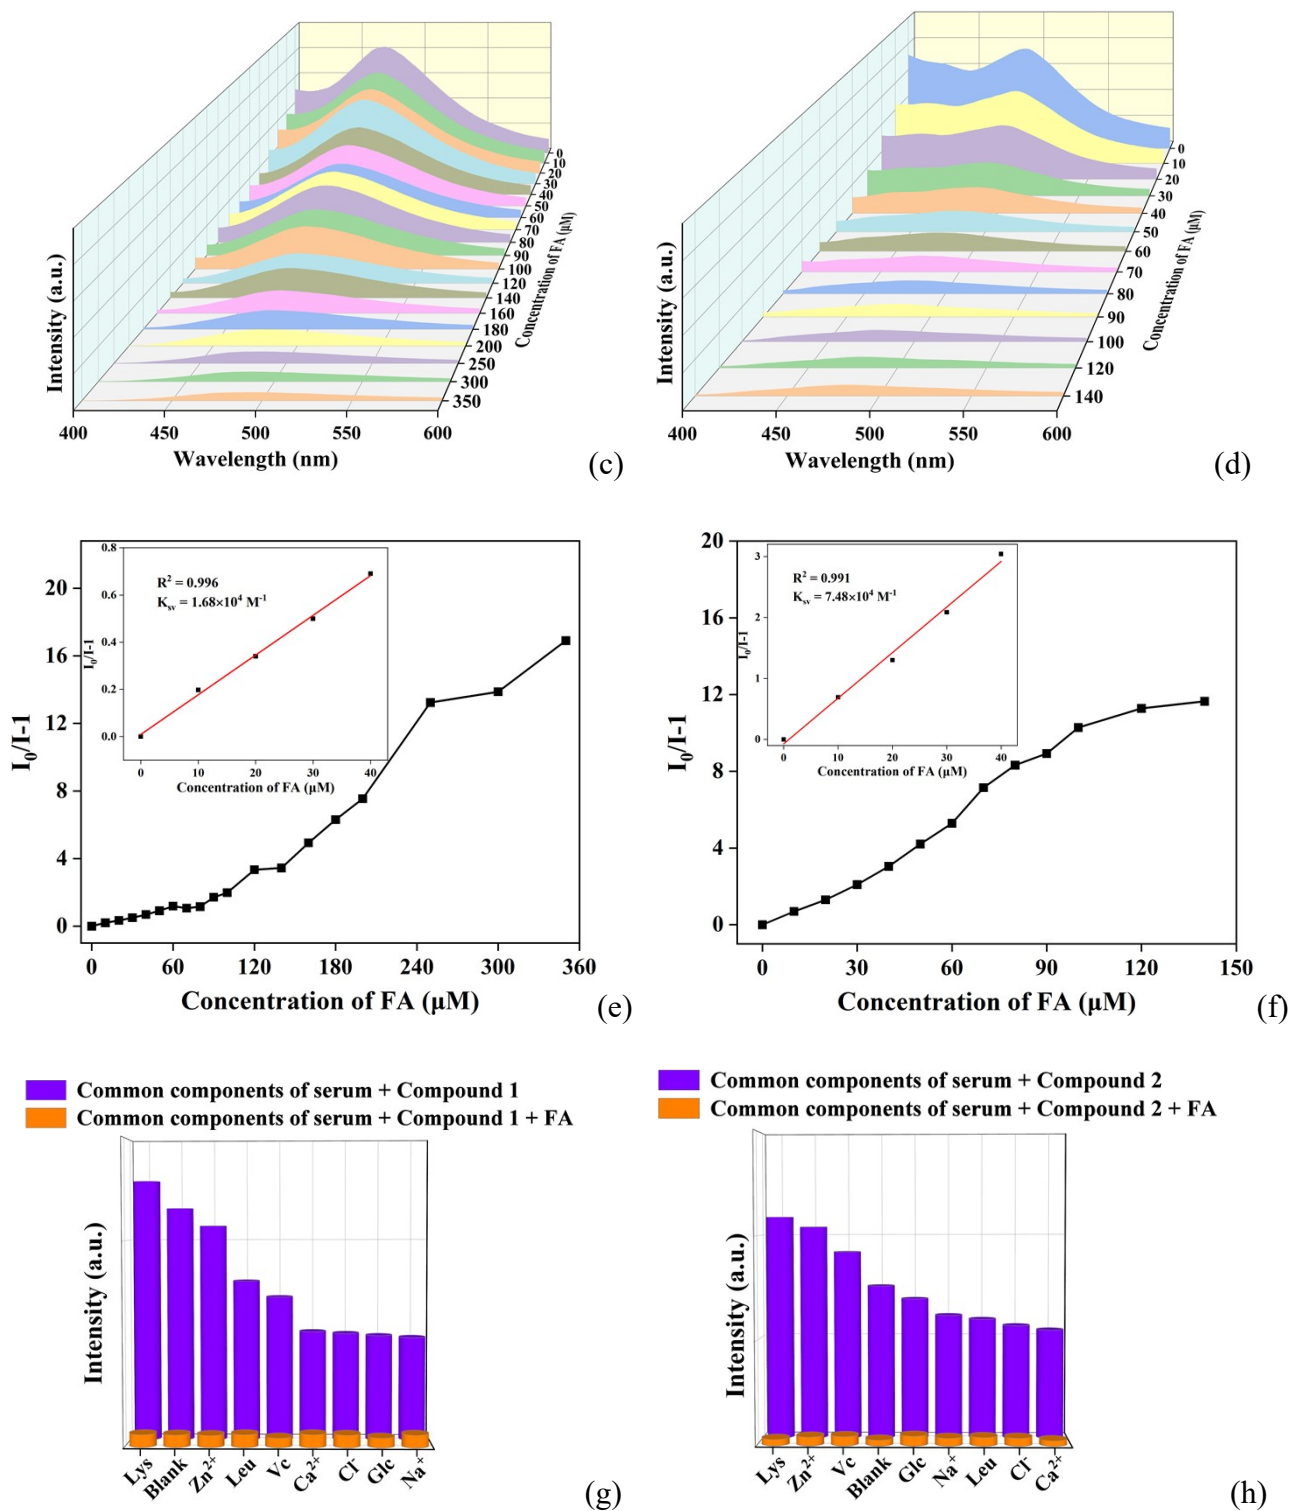

**Fig. S13.** (a) and (b) Emission response of **1** and **2** toward various biological analytes in serum. (c) and (d) Emission spectra of **1** and **2** at different concentrations of FA in serum. (e) and (f) The S-V plots of **1** and **2** toward FA in serum. (g) and (h) Anti-interference experiment with the addition of FA solution to other biological analytes.



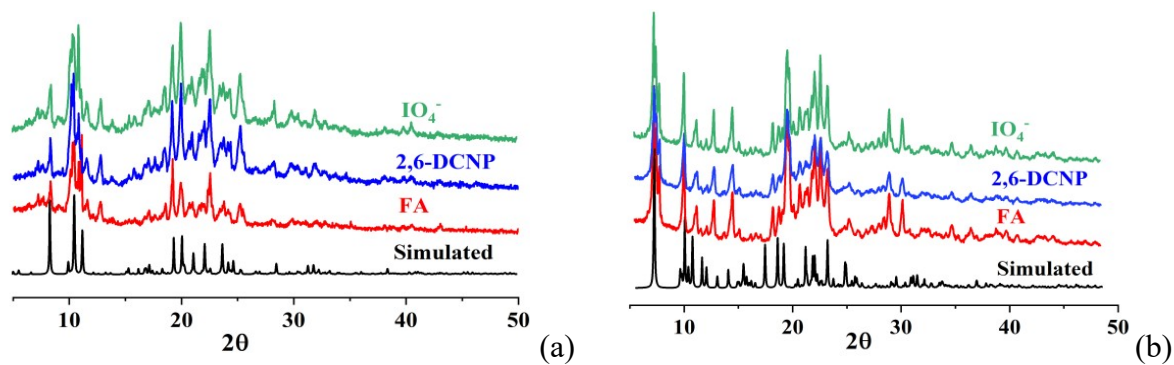

Fig. S14. PXRD patterns of 1 and 2 after the detection.

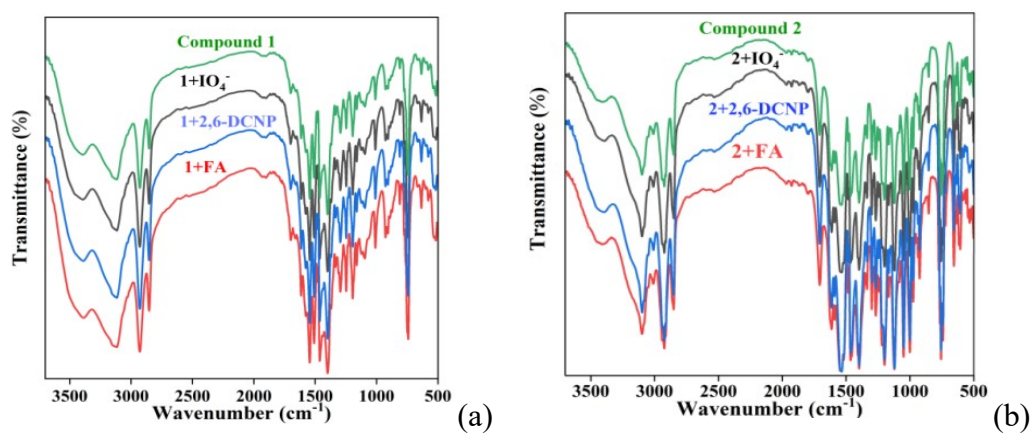

Fig. S15. IR spectra of 1 and 2 after the detection.

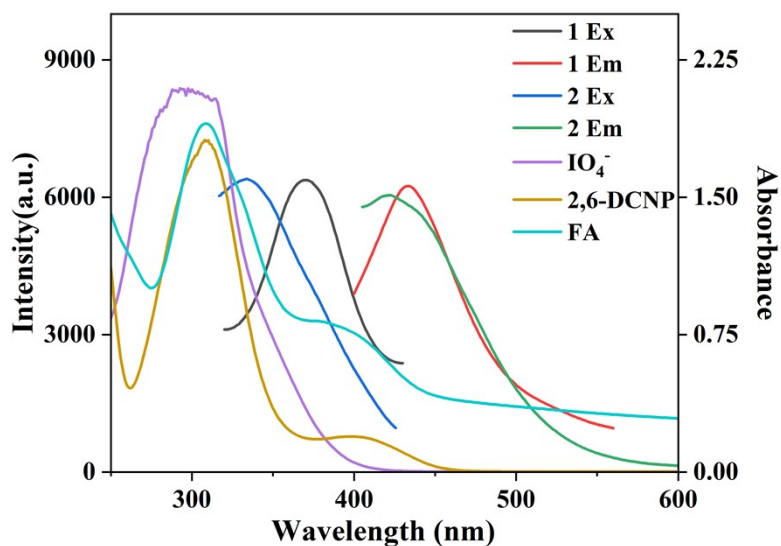

Fig. S16. The overlap of the UV-vis spectra of  $\text{IO}_4^-$ , 2,6-DCNP and FA with the excitation or emission spectra of 1 and 2.

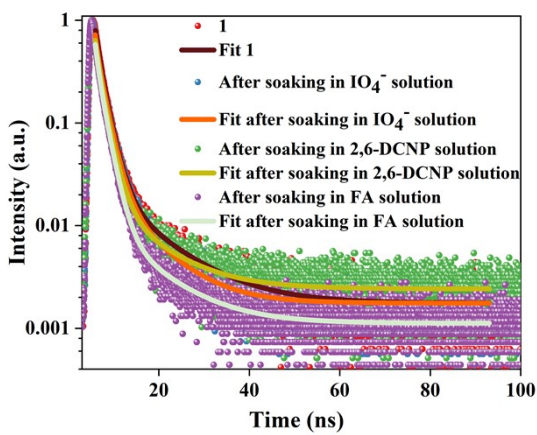

(a)

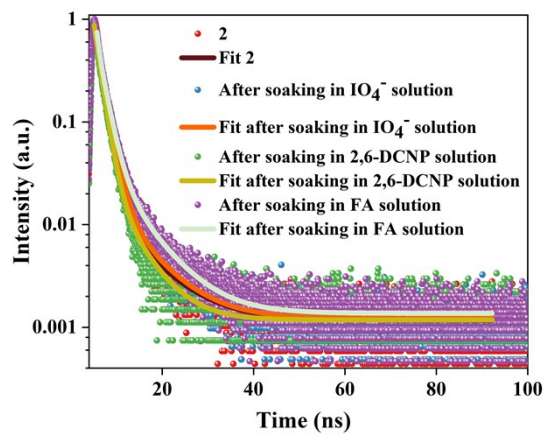

(b)

Fig. S17. Fluorescence lifetimes of 1 and 2 before and after addition of the analytes.

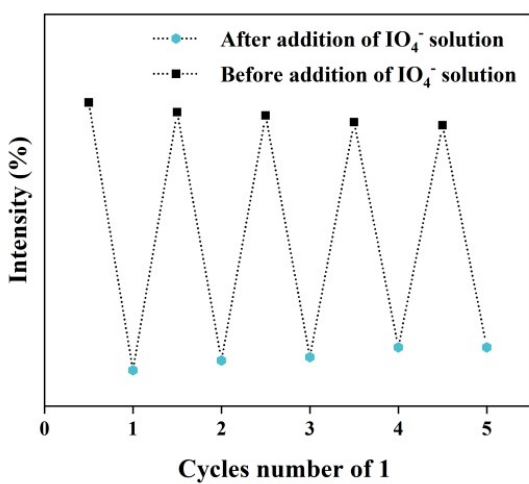

(a)

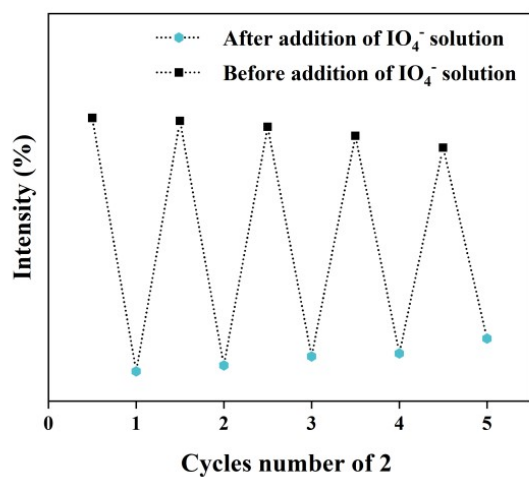

(b)

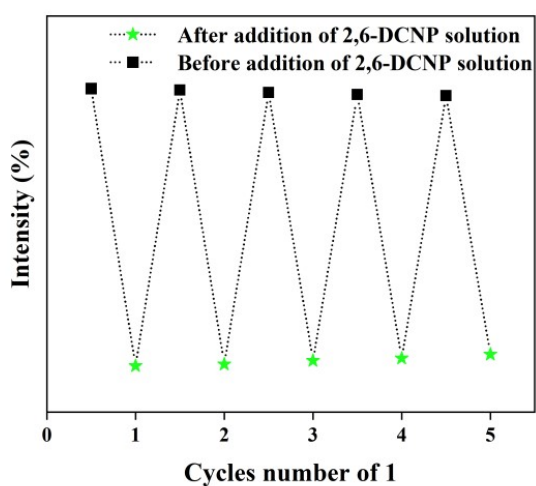

(c)

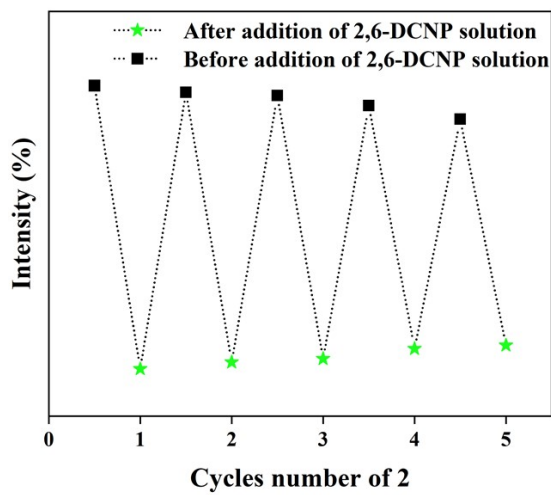

(d)

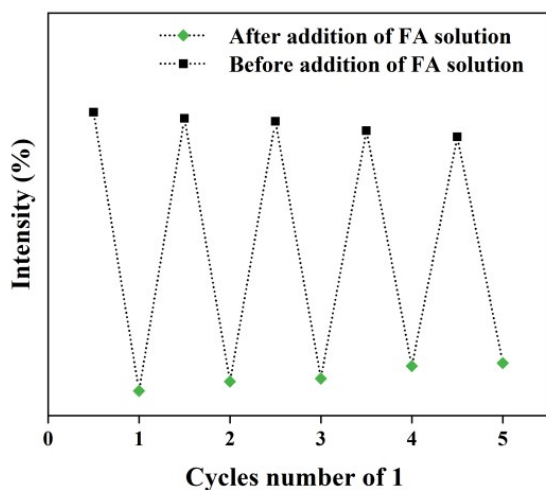

(e)

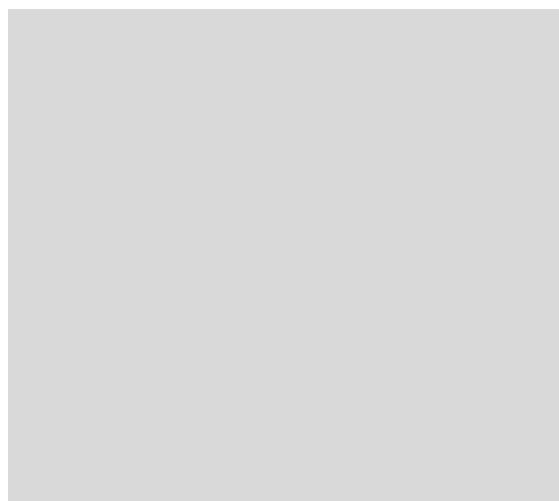

(f)

Fig. S18. The fluorescence intensity of **1** and **2** after five cycles of the experiment.

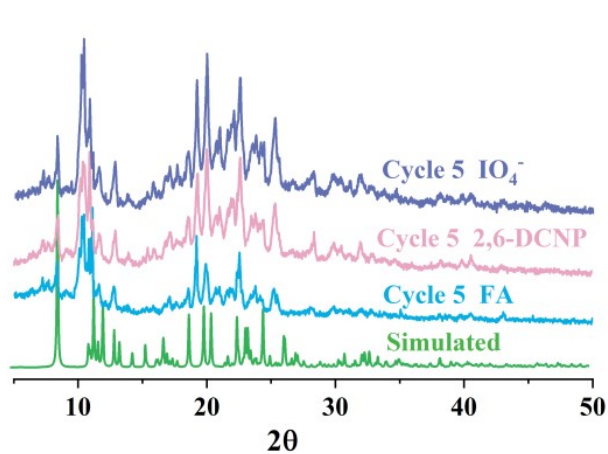

(a)

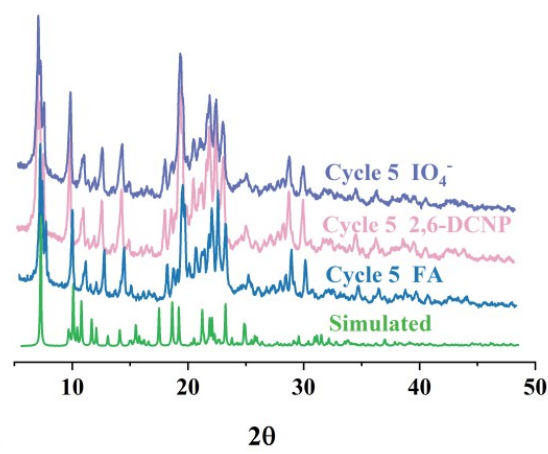

(b)

Fig. S19. PXRD patterns of **1** and **2** after five cycles of the experiment.

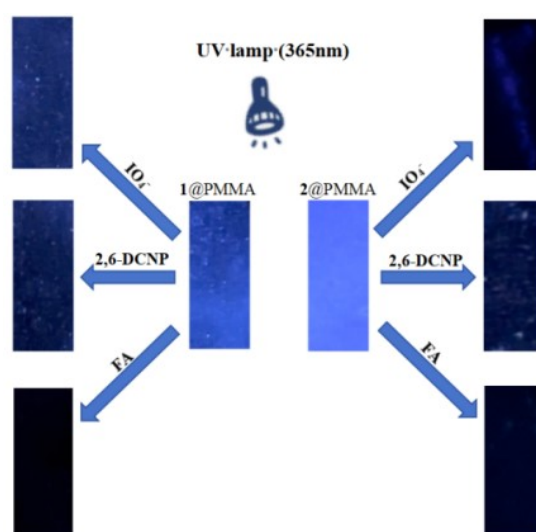

Fig. S20. The films of **1** and **2** toward  $\text{IO}_4^-$ , 2,6-DCNP and FA under 365 nm UV lamp.
